# Supplementary material
Source: publisher site journal article supplement (https://spandidos-publications.com/311/downloadSupplementary)

Figure S1. Volcano plot of all DEGs. The X-axis depicts the  $-\log_{10}(\text{adj.P.val})$  and the Y-axis depicts the FC. DEG, differentially expressed gene; adj.P.val, adjusted P-value; FC, fold change.

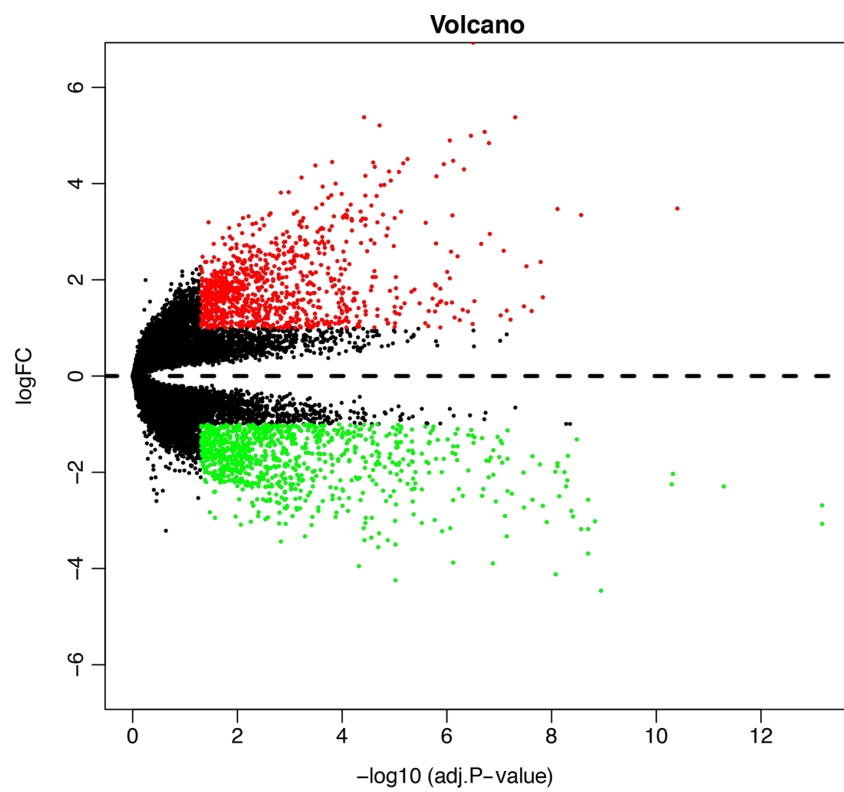

Figure S2. Unsupervised hierarchical analysis of the obtained DEGs was able to distinctly classify all samples into normal and OA groups. DEG, differentially expressed gene; OA, osteoarthritis.

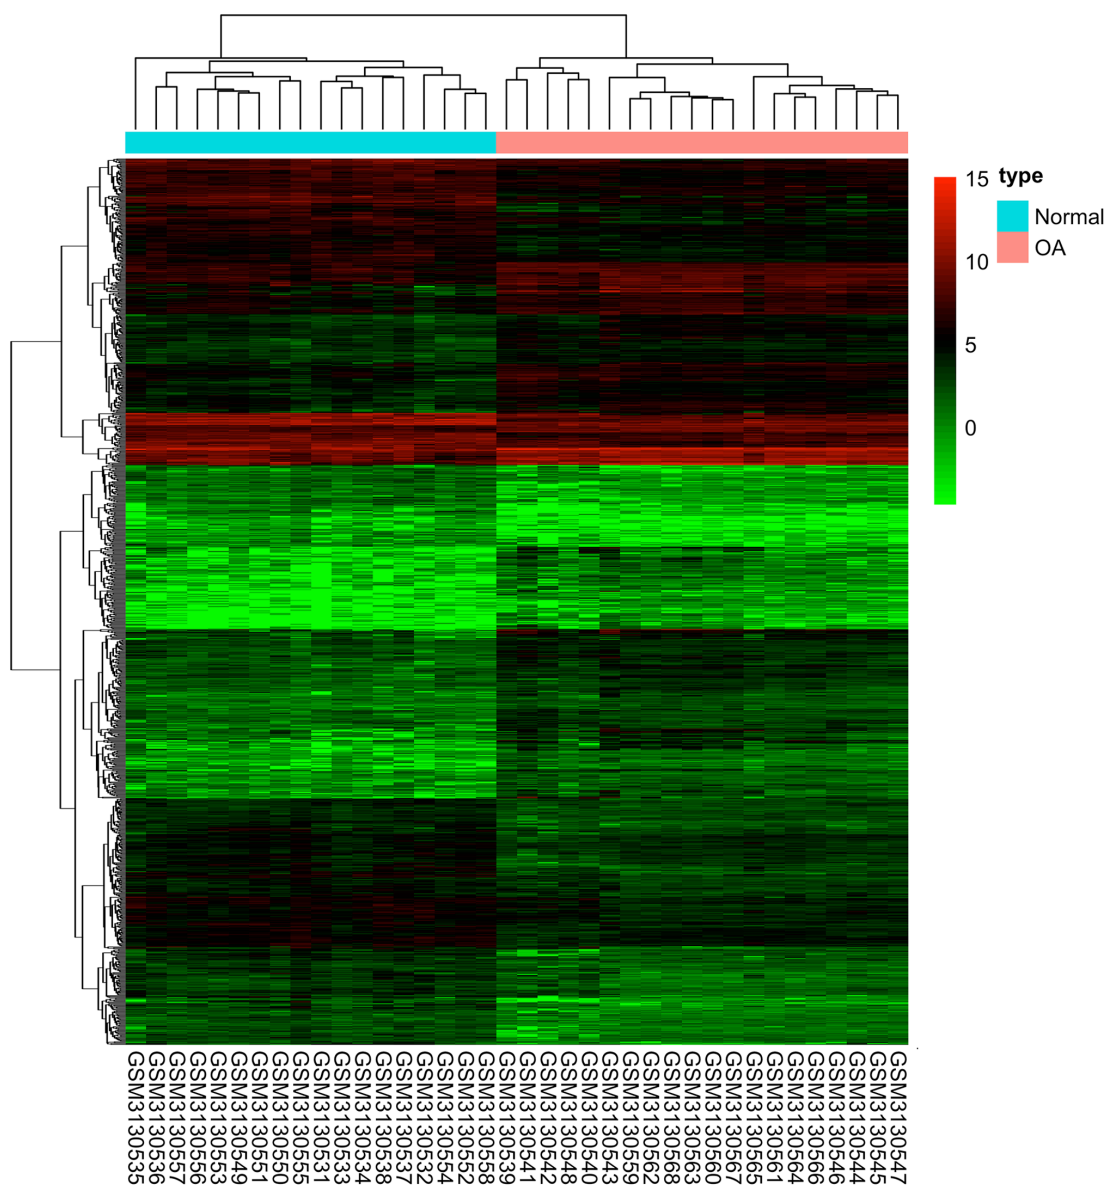

Supplement: Supplementary file 1 [file downloadSupplementary]
